# Supplementary material for: Single cell RNA-seq analysis identifies ferroptotic chondrocyte cluster and reveals TRPV1 as an anti-ferroptotic target in osteoarthritis
Source: PubMed Central journal article supplement — eBioMedicine. 2022 Sep 19;84:104258. doi: 10.1016/j.ebiom.2022.104258 (PMC9494174; doi:10.1016/j.ebiom.2022.104258), 2022-09-19

# Supplemental Western Blots

Uncropped blots for western blotting that appeared in the manuscript

Figure 1h

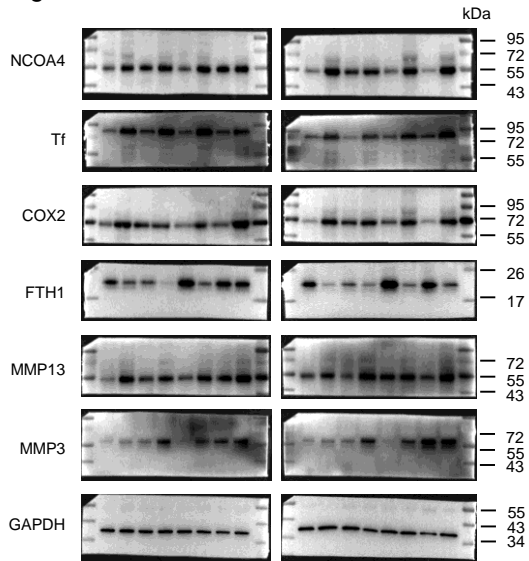

Figure 6a

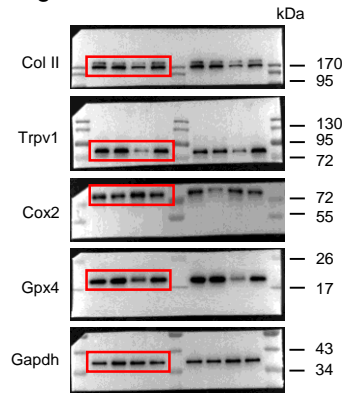

Figure 6e

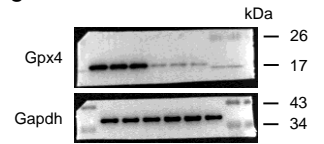

Supplementary figure 13d

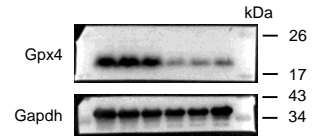

Supplement: mmc2.pdf [file mmc2.pdf]
